# Supplementary material
Source: publisher figshare collection journal article supplement (https://frontiersin.figshare.com/ndownloader/files/12420107)
Supplement: Supplementary file [file 12420107]

## Appendix A

### Self-efficacy and ski jumping performance

**Introduction:** The role of an athlete is complex and holds many different tasks and challenges. The following questions are designed to identify to which degree you, as a world cup ski jumper, strongly believe to master the many challenges you face.

Each question involves how sure you are in performing certain tasks and certain situations during ski jumping.

**Instructions:** Complete the following scale either before or after a competitive situation that you feel is highly important to you.

Read each question thoroughly and consider how sure you are in managing the tasks in the conditions described and circle the appropriate number to indicate how you feel right now, at this moment. Small degree of certainty = 1, and high degree of certainty = 7

**There are no right or wrong answers. Do not spend too much time on any one of the questions.**

| Small degree of certainty |   |   | Moderately degree of certainty |   |   | High degree of certainty |
|---------------------------|---|---|--------------------------------|---|---|--------------------------|
| 1                         | 2 | 3 | 4                              | 5 | 6 | 7                        |

#### Equipment

**How sure are you...:**

1. ...that today, your equipment is good enough to reach the highest level of performance in world cup competitions? 1 2 3 4 5 6 7
2. ...that your suit is optimal, so you are able to compete with the best in the world? 1 2 3 4 5 6 7
3. ...that your equipment gives you confidence in performing at the highest level in world cup? 1 2 3 4 5 6 7

#### Technique

**How sure are you...:**

4. ...that your in-run position is good enough to reach the highest level of performance in world cup competitions? 1 2 3 4 5 6 7
5. ...that your take-off technique is stable, and on a very high level in the world cup? 1 2 3 4 5 6 7

- |                                                                                                      |   |   |   |   |   |   |   |
|------------------------------------------------------------------------------------------------------|---|---|---|---|---|---|---|
| 6. ...that you are capable to fly effectively no matter what the outcome from the table is?          | 1 | 2 | 3 | 4 | 5 | 6 | 7 |
| 7. ...that your knowledge about ski jumping is good enough for high level performance (world class)? | 1 | 2 | 3 | 4 | 5 | 6 | 7 |

## **Stress**

### **How sure are you....:**

- |                                                                                                                     |   |   |   |   |   |   |   |
|---------------------------------------------------------------------------------------------------------------------|---|---|---|---|---|---|---|
| 8. ...that you feel calm and confident under pressure so you can perform on the highest level in world cup?         | 1 | 2 | 3 | 4 | 5 | 6 | 7 |
| 9. ...that you can perform at your best under pressure (e.g. leading after first round in a world cup competition)? | 1 | 2 | 3 | 4 | 5 | 6 | 7 |
| 10. ...that you can use stressful situations to perform better?                                                     | 1 | 2 | 3 | 4 | 5 | 6 | 7 |
| 11. ...that today, you are capable to be among the best ski jumpers in the world?                                   | 1 | 2 | 3 | 4 | 5 | 6 | 7 |

## Appendix B

### FLOW STATE SCALE (FSS)

#### *Flow state scale*

Please answer the following questions in relation to your experience in the event you have just completed. These questions relate to the thoughts and feelings you may have experienced during the event. There are no right or wrong answers. Think about how you felt during the event and answer the questions using the rating scale below. Circle the number that best matches your experience from the options to the right of each question.

#### *Rating scale:*

| Strongly disagree | Disagree | Neither agree nor disagree | Agree | Strongly agree |
|-------------------|----------|----------------------------|-------|----------------|
| 1                 | 2        | 3                          | 4     | 5              |

  

|                                                                                     | Strongly disagree |   |   |   | Strongly agree |
|-------------------------------------------------------------------------------------|-------------------|---|---|---|----------------|
| 1. I was challenged, but I believed my skills would allow me to meet the challenge. | 1                 | 2 | 3 | 4 | 5              |
| 2. I made the correct movements without thinking about trying to do so.             | 1                 | 2 | 3 | 4 | 5              |
| 3. I knew clearly what I wanted to do.                                              | 1                 | 2 | 3 | 4 | 5              |
| 4. It was really clear to me that I was doing well.                                 | 1                 | 2 | 3 | 4 | 5              |
| 5. My attention was focused entirely on what I was doing.                           | 1                 | 2 | 3 | 4 | 5              |
| 6. I felt in total control of what I was doing.                                     | 1                 | 2 | 3 | 4 | 5              |
| 7. I was not concerned with what others may have been thinking of me.               | 1                 | 2 | 3 | 4 | 5              |
| 8. Time seemed to alter (either slowed down or speeded up).                         | 1                 | 2 | 3 | 4 | 5              |
| 9. I really enjoyed the experience.                                                 | 1                 | 2 | 3 | 4 | 5              |
| 10. My abilities matched the high challenge of the situation.                       | 1                 | 2 | 3 | 4 | 5              |
| 11. Things just seemed to be happening automatically.                               | 1                 | 2 | 3 | 4 | 5              |
| 12. I had a strong sense of what I wanted to do.                                    | 1                 | 2 | 3 | 4 | 5              |
| 13. I was aware of how well I was performing.                                       | 1                 | 2 | 3 | 4 | 5              |
| 14. It was no effort to keep my mind on what was happening.                         | 1                 | 2 | 3 | 4 | 5              |
| 15. I felt like I could control what I was doing.                                   | 1                 | 2 | 3 | 4 | 5              |
| 16. I was not worried about my performance during the event.                        | 1                 | 2 | 3 | 4 | 5              |
| 17. The way time passed seemed to be different                                      | 1                 | 2 | 3 | 4 | 5              |

from normal.

|                                                                              |   |   |   |   |   |   |
|------------------------------------------------------------------------------|---|---|---|---|---|---|
| 18. I loved the feeling of that performance and want to capture it again.    | 1 | 2 | 3 | 4 | 5 |   |
| 19. I felt I was competent enough to meet the high demands of the situation. | 1 | 2 | 3 | 4 | 5 |   |
| 20. I performed automatically.                                               | 1 | 2 | 3 | 4 | 5 |   |
| 21. I knew what I wanted to achieve.                                         | 1 | 2 | 3 | 4 | 5 |   |
| 22. I had a good idea while I was performing about how well I was doing.     | 1 | 2 | 3 | 4 | 5 |   |
| 23. I had total concentration.                                               | 1 | 2 | 3 | 4 | 5 |   |
| 24. I had a feeling of total control.                                        | 1 | 2 | 3 | 4 | 5 |   |
| 25. I was not concerned with how I was presenting myself.                    | 1 | 2 | 3 | 4 | 5 |   |
| 26. It felt like time stopped while I was performing.                        | 1 | 2 | 3 | 4 | 5 |   |
| 27. The experience left me feeling great.                                    |   | 1 | 2 | 3 | 4 | 5 |
| 28. The challenge and my skills were at an equally high level.               | 1 | 2 | 3 | 4 | 5 |   |
| 29. I did things spontaneously and automatically without having to think.    | 1 | 2 | 3 | 4 | 5 |   |
| 30. My goals were clearly defined.                                           | 1 | 2 | 3 | 4 | 5 |   |
| 31. I could tell by the way I was performing how well I was doing.           | 1 | 2 | 3 | 4 | 5 |   |
| 32. I was completely focused on the task at hand.                            | 1 | 2 | 3 | 4 | 5 |   |
| 33. I felt in total control of my body.                                      | 1 | 2 | 3 | 4 | 5 |   |
| 34. I was not worried about what others may have been thinking of me.        | 1 | 2 | 3 | 4 | 5 |   |
| 35. At times, it almost seemed like things were happening in slow motion.    | 1 | 2 | 3 | 4 | 5 |   |
| 36. I found the experience extremely rewarding.                              | 1 | 2 | 3 | 4 | 5 |   |

## Appendix C

### PANAS

This scale consists of a number of words that describe different feelings and emotions. Read each item and then mark the appropriate answer in the space next to the word. Indicate to what extent you have felt like this before, after or during a recent world cup competition. Use the following scale to record your answers.

| Very slightly or<br>not at all |       | a little |  | moderately        |  | quite a bit |  | extremely |
|--------------------------------|-------|----------|--|-------------------|--|-------------|--|-----------|
| 1                              |       | 2        |  | 3                 |  | 4           |  | 5         |
| Interested                     | _____ |          |  | Irritable         |  | _____       |  |           |
| Distressed                     | _____ |          |  | Alert             |  | _____       |  |           |
| Excited                        | _____ |          |  | Ashamed           |  | _____       |  |           |
| Upset                          | _____ |          |  | Inspired          |  | _____       |  |           |
| Strong                         | _____ |          |  | Nervous           |  | _____       |  |           |
| Guilty                         | _____ |          |  | Determined        |  | _____       |  |           |
| Scared                         | _____ |          |  | Attentive         |  | _____       |  |           |
| Hostile                        | _____ |          |  | Jittery (anxious) |  | _____       |  |           |
| Enthusiastic                   | _____ |          |  | Active            |  | _____       |  |           |
| Proud                          | _____ |          |  | Afraid            |  | _____       |  |           |

## Appendix D

### The original version of the Penn State Worry Questionnaire

**Instruction:** Enter the number that best describes how typical or characteristic each item is of you, putting the number next to each item.

|           | 1                     | 2 | 3                   | 4 | 5               |
|-----------|-----------------------|---|---------------------|---|-----------------|
|           | Not at all<br>typical |   | Somewhat<br>typical |   | Very<br>typical |
| _____ 1.  |                       |   |                     |   |                 |
| _____ 2.  |                       |   |                     |   |                 |
| _____ 3.  |                       |   |                     |   |                 |
| _____ 4.  |                       |   |                     |   |                 |
| _____ 5.  |                       |   |                     |   |                 |
| _____ 6.  |                       |   |                     |   |                 |
| _____ 7.  |                       |   |                     |   |                 |
| _____ 8.  |                       |   |                     |   |                 |
| _____ 9.  |                       |   |                     |   |                 |
| _____ 10. |                       |   |                     |   |                 |
| _____ 11. |                       |   |                     |   |                 |
| _____ 12. |                       |   |                     |   |                 |
| _____ 13. |                       |   |                     |   |                 |
| _____ 14. |                       |   |                     |   |                 |
| _____ 15. |                       |   |                     |   |                 |
| _____ 16. |                       |   |                     |   |                 |
